# Supplementary material for: Capturing patterns of evolutionary relatedness with reflectance spectra to model and monitor biodiversity
Source: PubMed Central journal article supplement — Proc Natl Acad Sci U S A. 2023 Jun 5;120(24):e2215533120. doi: 10.1073/pnas.2215533120 (PMC10268299; doi:10.1073/pnas.2215533120), 2023-06-05
Supplement: pnas.2215533120.sapp.pdf [file pnas.2215533120.sapp.pdf]

1 **Supplementary information to the following publication:** Griffith, D.M., Byrd, K.B.,  
2 Anderegg, L.D.L., Yacoub, R., Gatzolis, D., Roberts, D., Nemani, R.R. (2022) Capturing  
3 patterns of evolutionary relatedness with reflectance spectra to model and monitor biodiversity.  
4

5 **Contents**

- 6  
7 Supplementary Figure 1  
8 Supplementary Figure 2  
9 Supplementary Figure 3  
10 Supplementary Figure 4  
11 Supplementary Figure 5  
12 Supplementary Figure 6  
13 Supplementary Methods 1  
14 Supplementary Figure 8  
15 Supplementary Figure 9  
16 Supplementary Figure 10

17  
18  
19

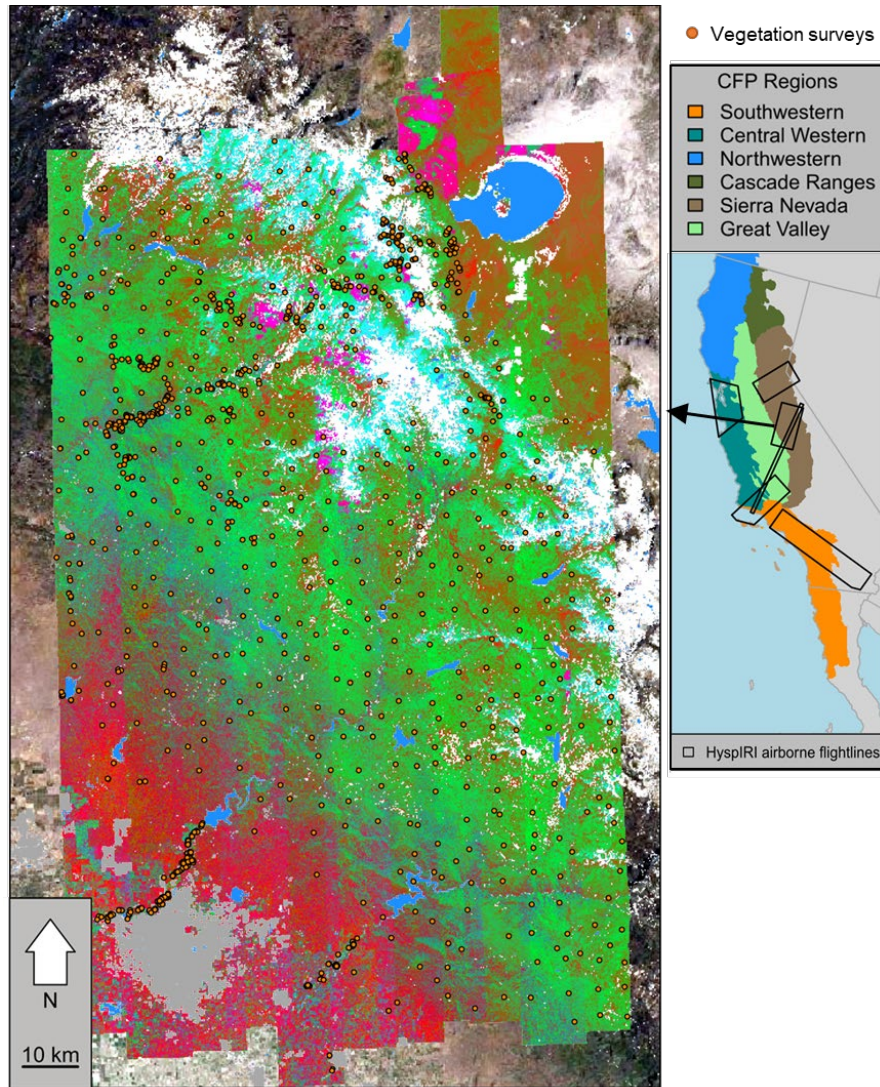

20  
21  
22  
23  
24  
25  
26  
27  
28  
29  
30  
31  
32

Figure S1. Minimum Noise Fraction representation (bands 2, 3, and 4 as RGB) of the Southern Sierra Nevada Airborne Visible/Infrared Imaging Spectrometer (AVIRIS) hyperspectral data. This visualization approach illustrates the variation present in the highly multi-dimensional spectral dataset. Forest Inventory and Analysis (FIA) plot data are included in this figure (locations for figure are spatially fuzzed following FIA protocol, but exact plot locations were used in analysis). Notably, ‘banding effects’ due to influences such as sun-angle effects are highly noticeable in the spectral data along each flight line. We discuss the impact of these artifacts for our study and remote sensing in the Discussion.

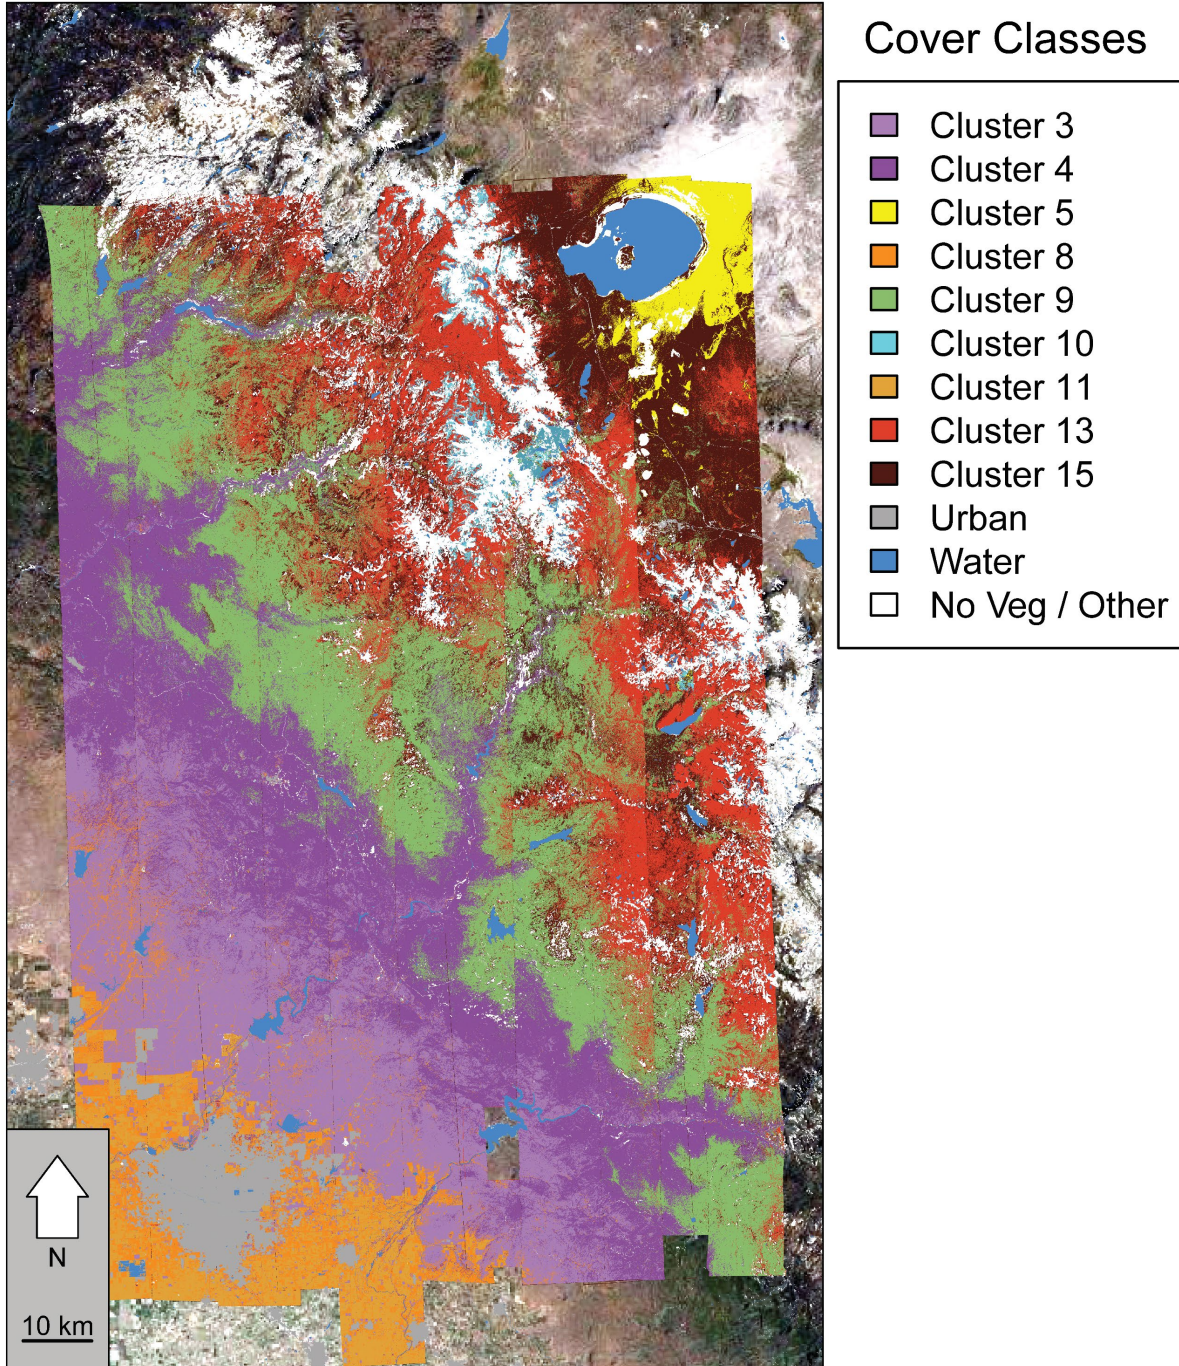

33  
 34  
 35  
 36  
 37  
 38  
 39  
 40  
 41

Figure S2. Results of K-means clustering of spectra. Spectral Clusters 8 and 11 are associated with agricultural activity around Fresno, CA, and intersected 69 and 28 vegetations plots respectively (they were assigned two shades of orange). Spectral Clusters 3 and 4 had 99 and 274 plots. Spectral Clusters 9, 10, 13, 15 had 222, 35, 260, and 165 plots, respectively. Sun-angle impacts are noticeable and discussed in text.

Supplementary Information Griffith *et al* (2022)

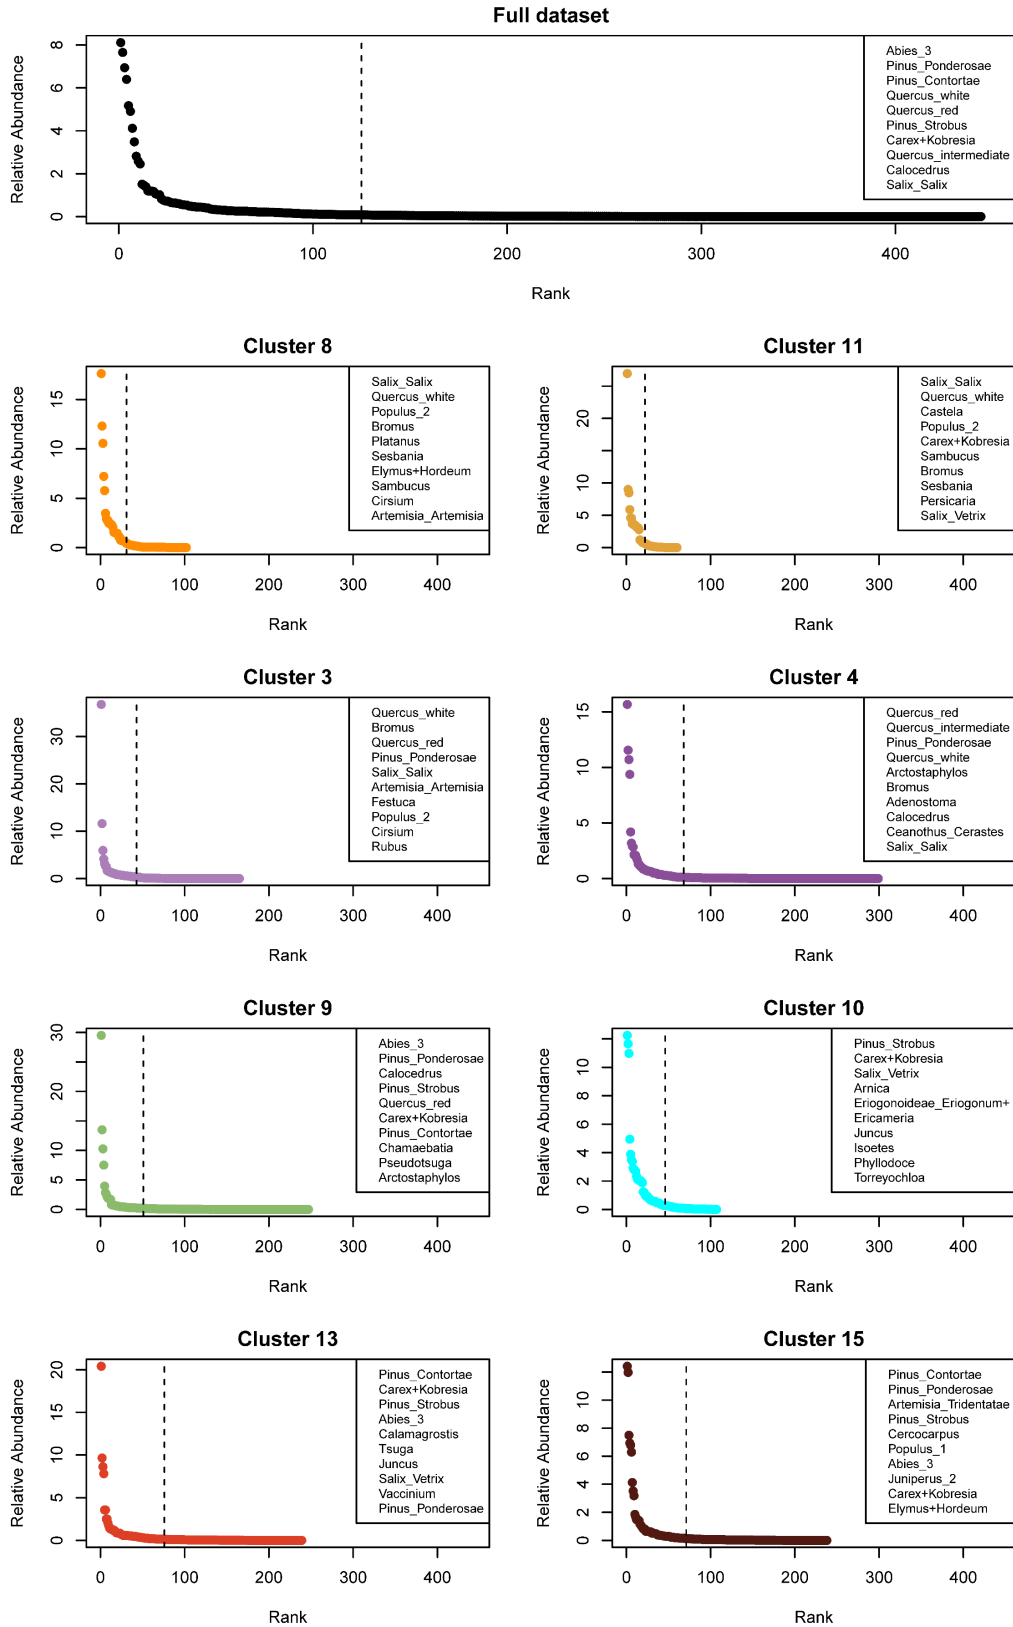

42  
43  
44

Figure S3. Rank abundance curves for vegetation plot data in each of 8 spectral clusters. The vegetation data come from Vegbank, VegCamp, and FIA.

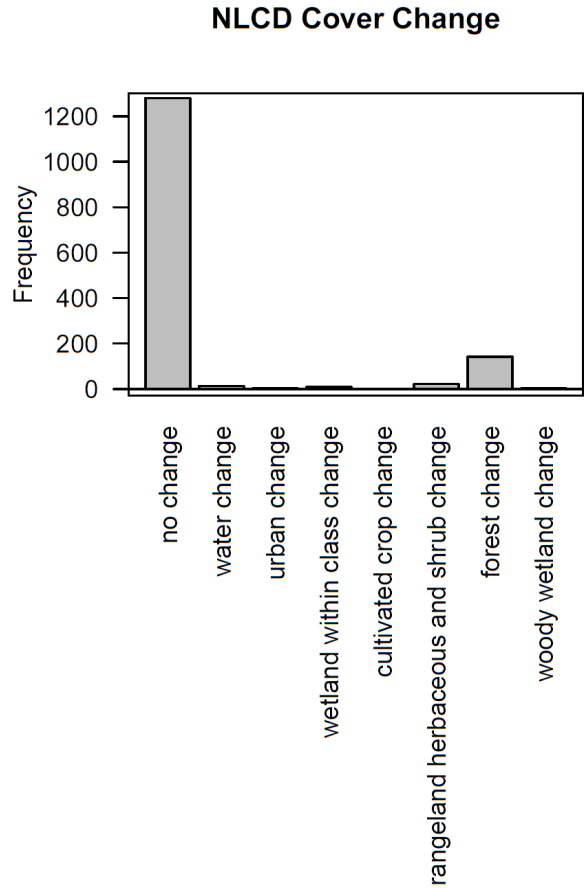

45  
46 Figure S4. Frequency of original dataset in each land cover change category from years 2000 to  
47 2019.  
48  
49  
50

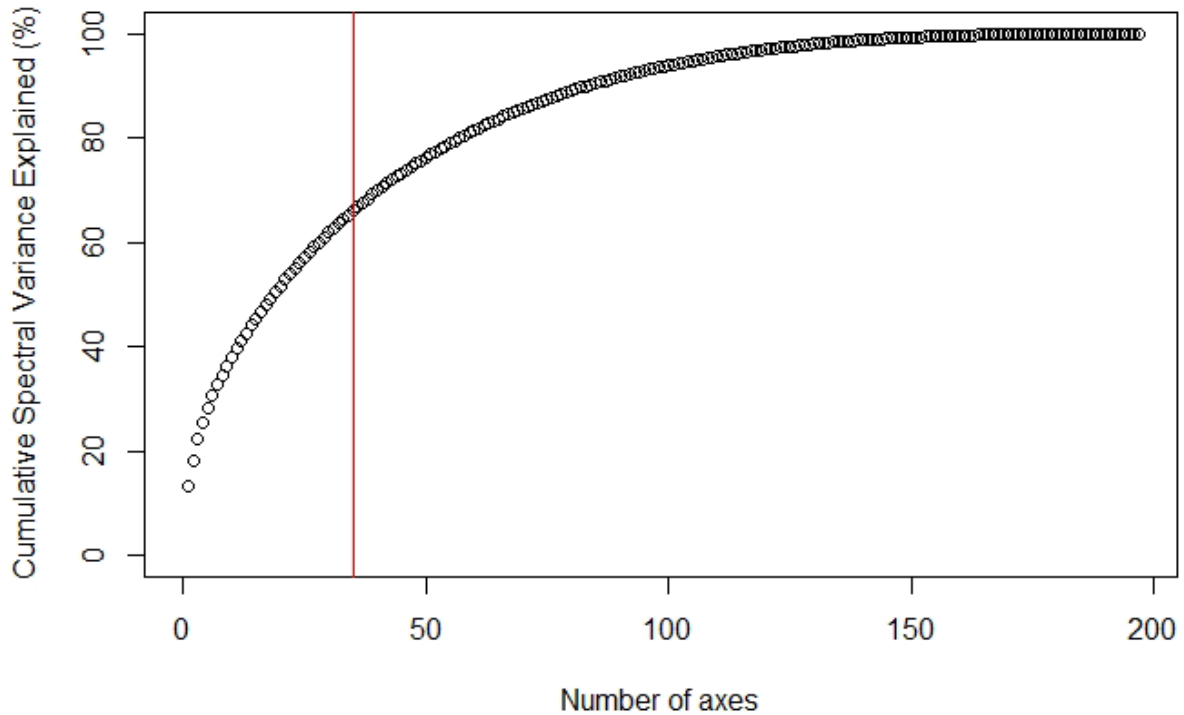

51  
52 Figure S5. Selection of CDA (Canonical Discriminant Analysis) axes for dimension reduction.  
53 This screeplot represents the cumulative variance explained in the spectral data based on the  
54 number of CDA axes. The axes in CDA are optimized for emphasizing spectral difference  
55 among the dominant plant species in each represented spectrum based on vegetation data, which  
56 differs from more standard ordination approaches. As a result, the screeplot is not as steep as  
57 many other methods of ordination as the focus is not on explaining spectral variation with few  
58 axes, but instead on distinguishing plants. We selected the axes that together explained two-  
59 thirds of the variation in spectral data based on the number of bands selected in Meerdink *et al*  
60 (2019) and to enable data processing to occur in a reasonable time frame.

61  
62

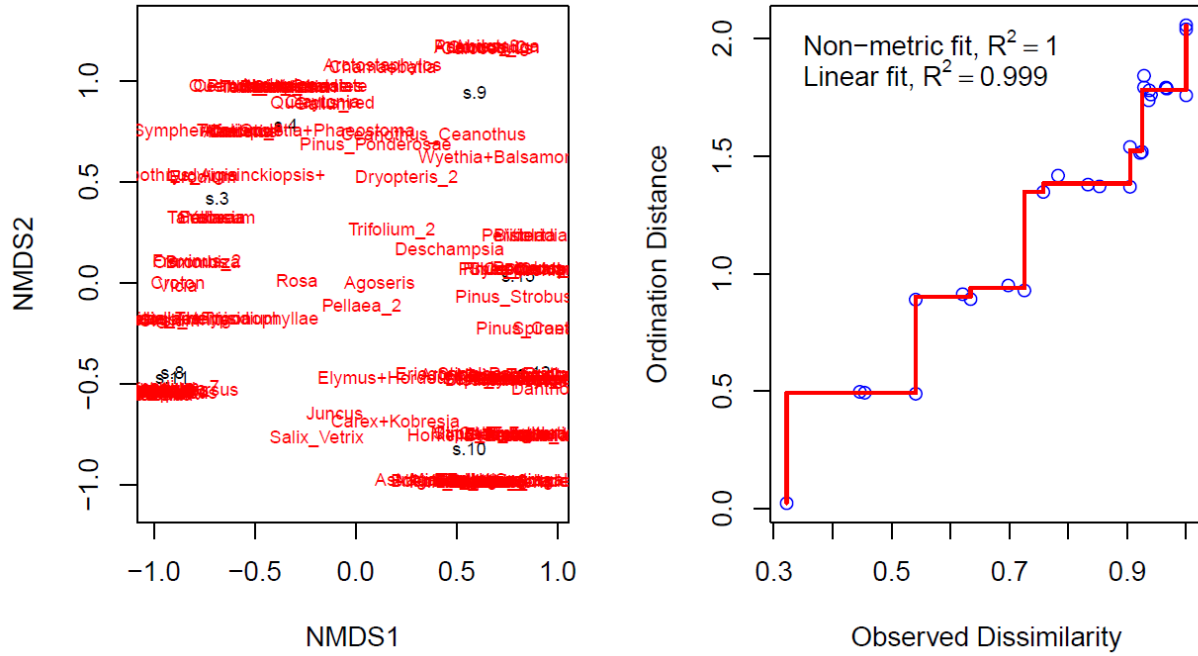

63  
64  
65  
66  
67  
68  
69  
70  
71  
72  
73  
74  
75  
76  
77  
78  
79

Figure S6. Non-metric Multidimensional Scaling ordination results. On the left panel, red text shows the Operational Taxonomic Units (OTU) positions in in multivariate space, whereas black text indicates the position of Spectral Clusters in multivariate space (e.g., “s.9” is Spectral Cluster #9).

80 Supplementary Methods S1.

81 We considered several approaches for generating Lineage Functional Types. First, we considered  
82 a simple age-based approach that cut the phylogeny into different sized lineages using an age  
83 threshold (Fig. S7). However, this approach was unsatisfactory because it was biased towards the  
84 basal grade and had no potential for explicitly including abundance data or for vegetation traits  
85 that should be balanced in the generation of LFTs. Alternatively, we tried the KSI method from  
86 Cornwell *et al.*, (2014) which searches for lineages with distinct functional synapomorphies.  
87 While a modification of this approach might be a major improvement in the future, the result we  
88 received with PCA axes as substitutes for traits didn't reflect the vegetation patterns we see in  
89 the Indicator Species Analysis and it selected lineages that were most unique (leaving many  
90 species unselected) and not balanced across the tree. Fig S8 illustrates the poor performance of  
91 this method as compared to the simple spectrally informed LFT generation approach we used.

92  
93

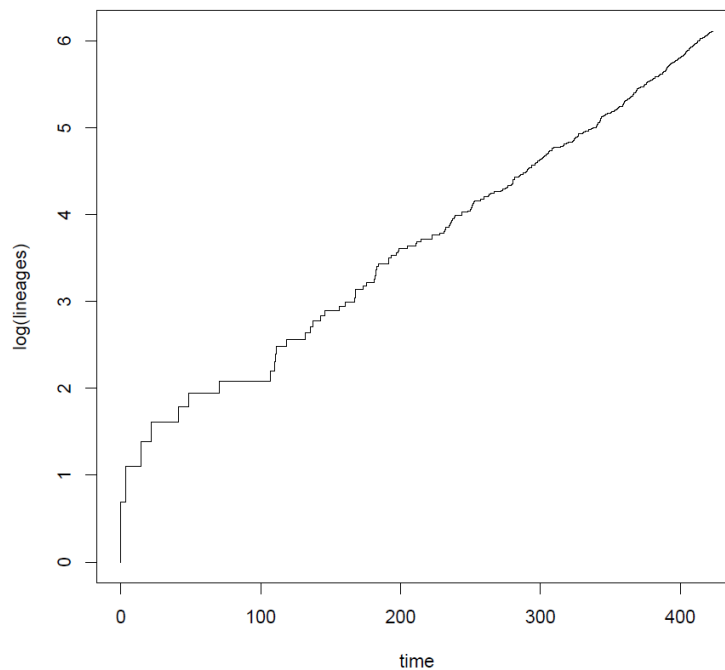

94  
95  
96  
97  
98  
99  
100

Figure S7. Log lineages over time, used for splitting the tree based on age. These cuts were completed on the full tree which comprises the 1572 species in our study.



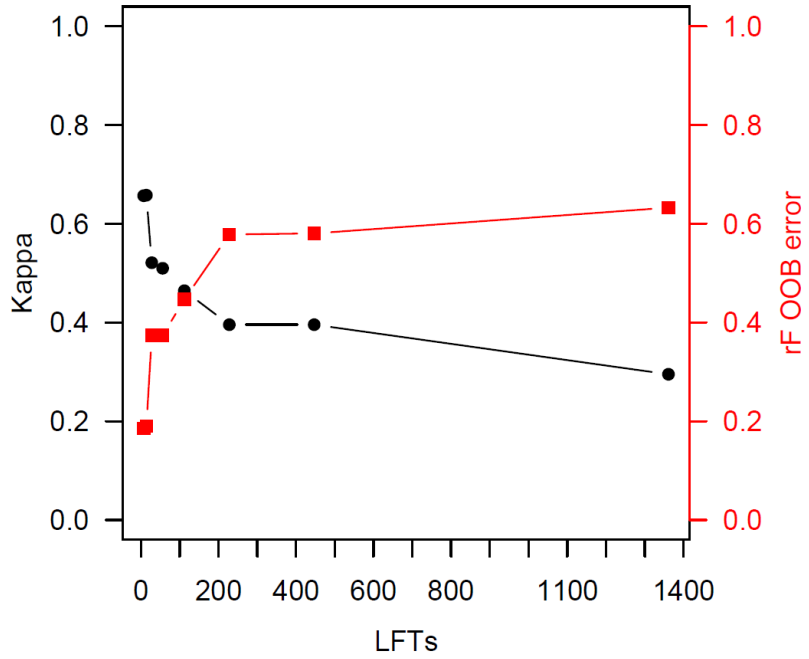

101  
102  
103  
104  
105  
106  
107  
108  
109  
110

Figure S8. PLS-DA classification Kappa in black and random forest Out of Bag (OOB) error in red for classifications based on different numbers of cuts to phylogeny.

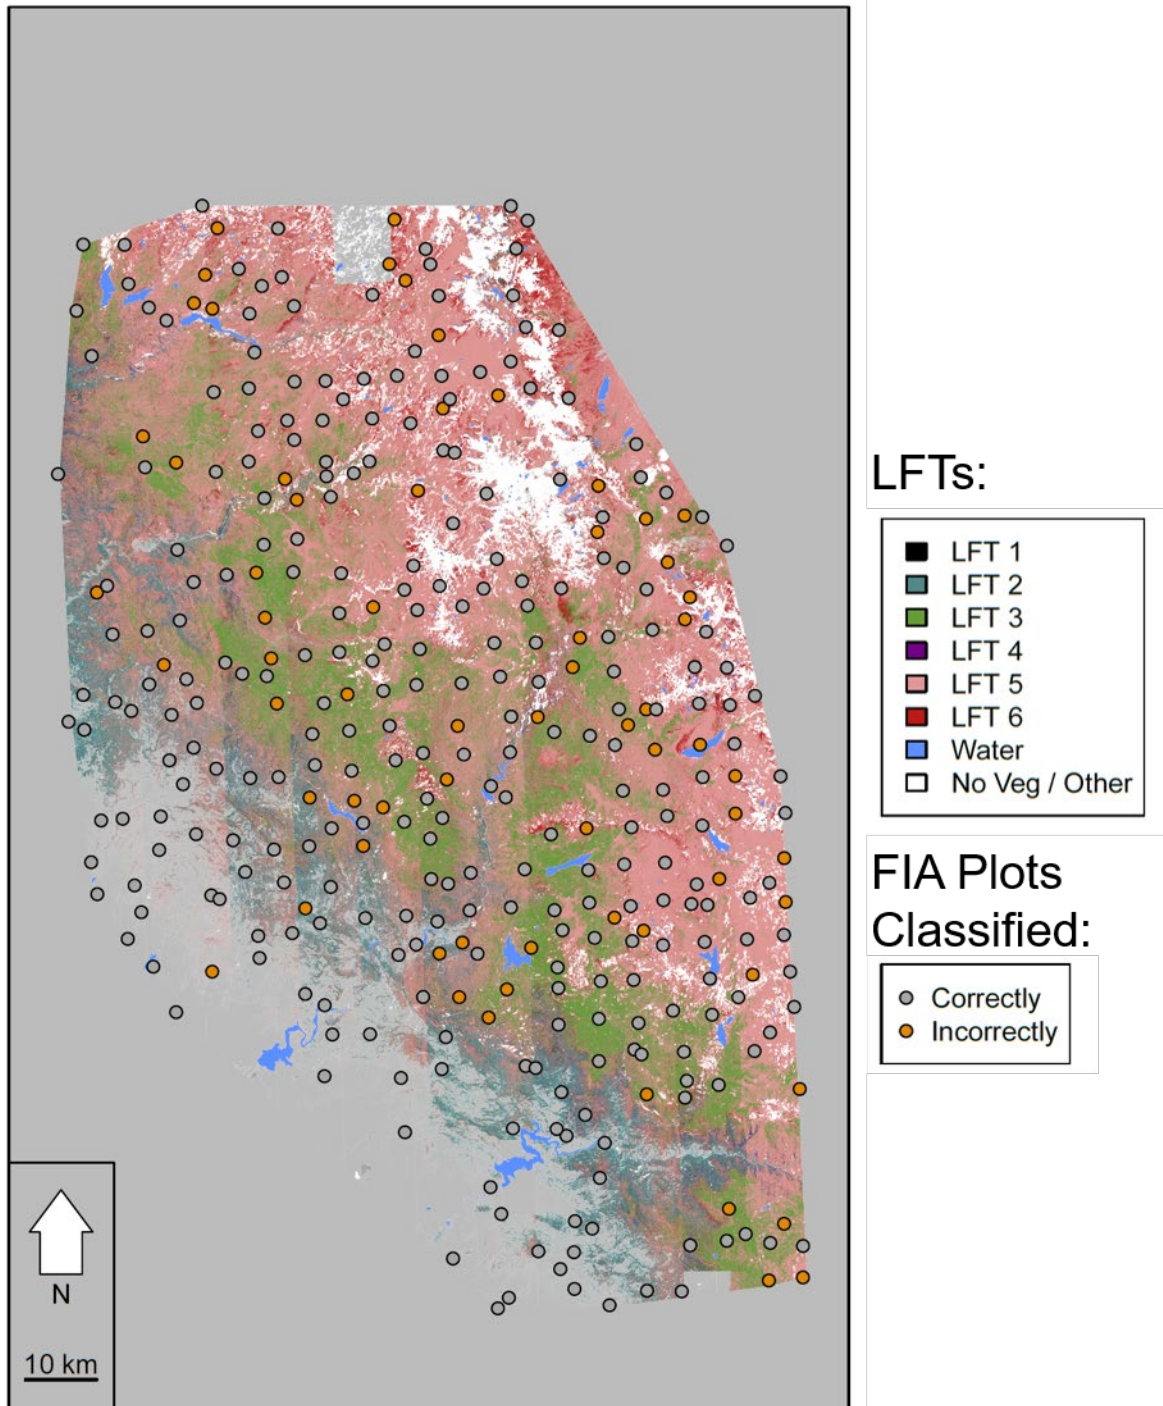

111  
112 Figure S9. Spatial visualization of Support Vector Machine classification error based on the FIA  
113 data. FIA plots shown in the figure are fuzzed-and-swapped but the spatial statistics were  
114 performed using the actual plot coordinates. We used the Join-Count Statistic in the spdep R  
115 package to show that the classification errors are not clustered ( $p = 0.43$ ).  
116

117  
118

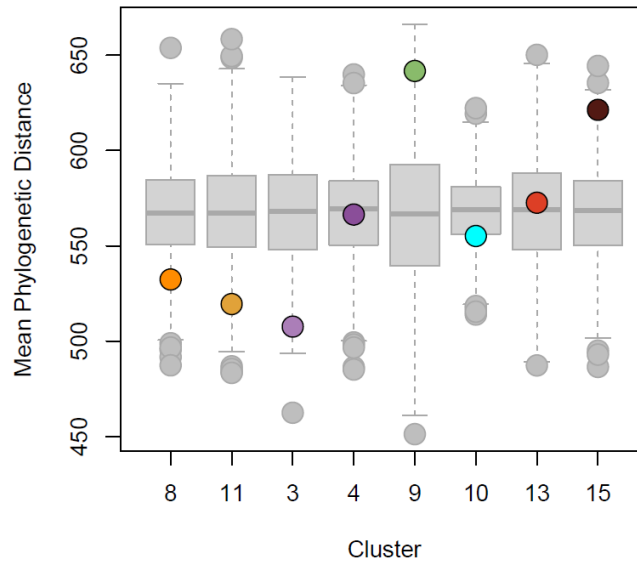

119  
120  
121  
122  
123  
124  
125  
126  
127  
128  
129

Figure S10. Mean Phylogenetic Distance (MPD) for each spectral cluster overlaid on null distributions generated by simulating community assembly from the phylogeny in Fig. 2 999 times. Over half of the naïve spectral clusters represented indicator species that were more phylogenetically related than expected, and only two of the eight clusters were phylogenetically ‘over dispersed,’ or less related than expected. We calculated MPD using the R packages ‘ape’ and ‘picante’ – MPD is simply the mean of the distances of all the species in a community along the edges of the evolutionary tree. To generate null models we simulated the assembly of communities into each spectral cluster ( $n = 999$ ) and calculated the MPD in each cluster (Paradis et al., 2004; Kembel et al., 2010). We then compared the actual MPD for each cluster with the simulated null distribution.
